# Supplementary material for: The Use of Electronic Nose in the Quality Evaluation and Adulteration Identification of Beijing-You Chicken
Source: MDPI journal article supplement (doi:10.3390/foods11060782), 2022-03-08
Supplement: s1 [file s1]

## Supplementary Materials

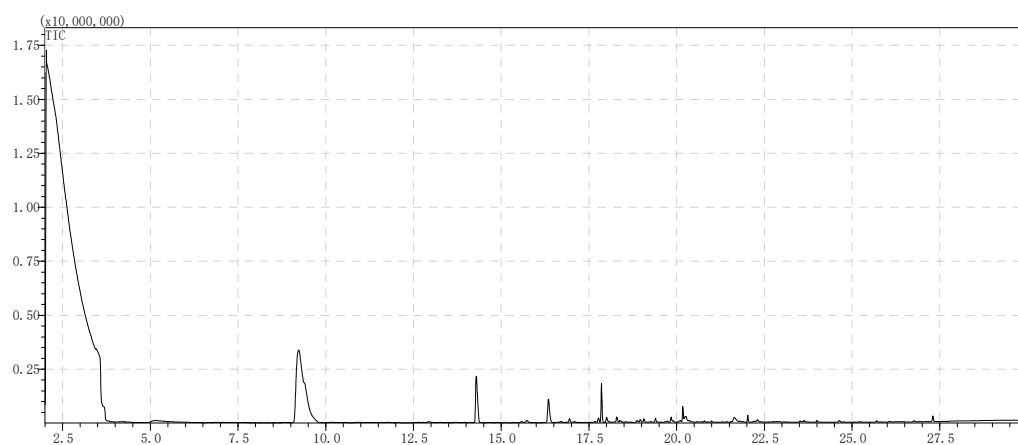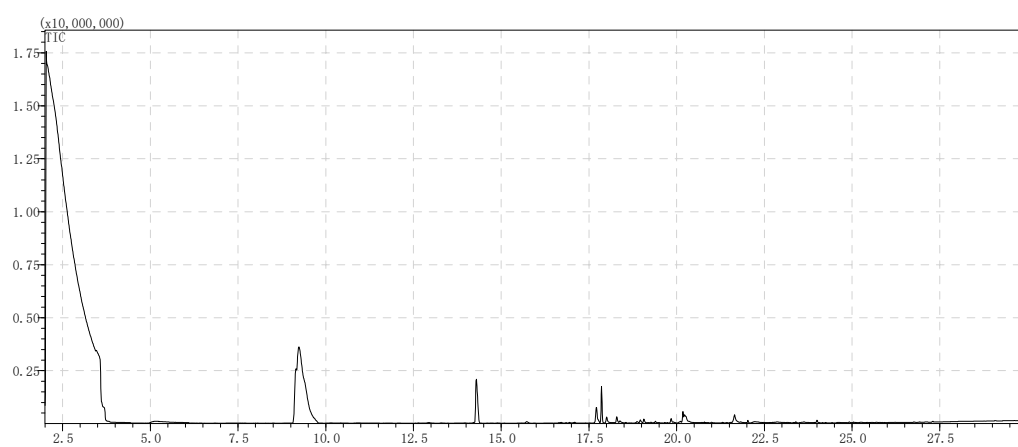

**Figure S1.** VOCs chromatograms of BJJ breast

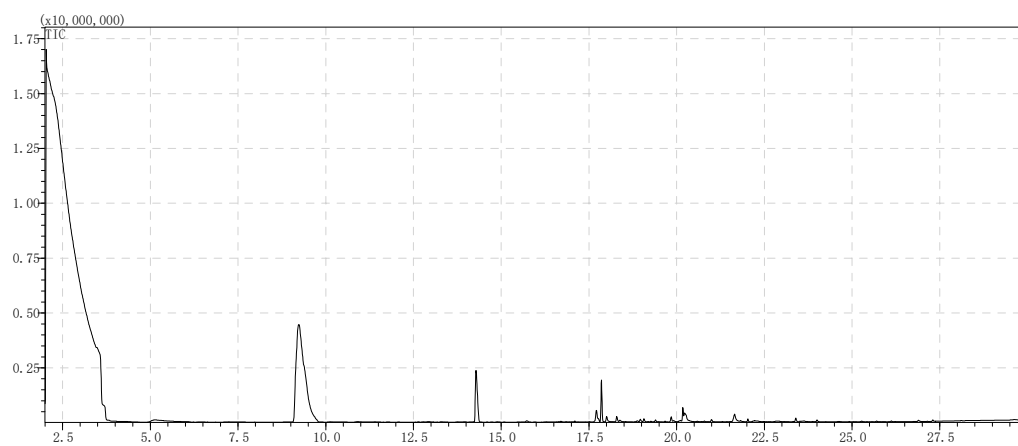

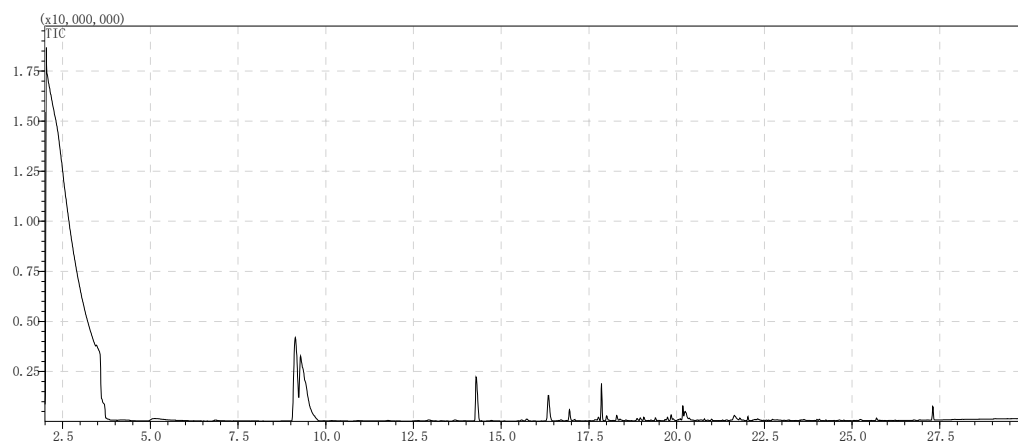

**Figure S2.** VOCs chromatograms of LH breast

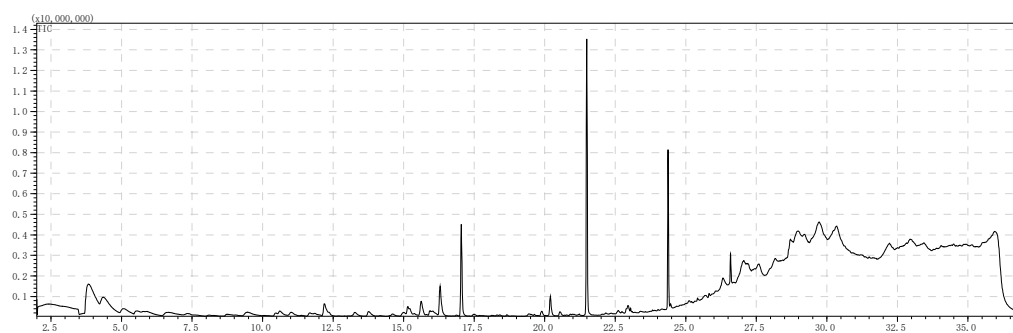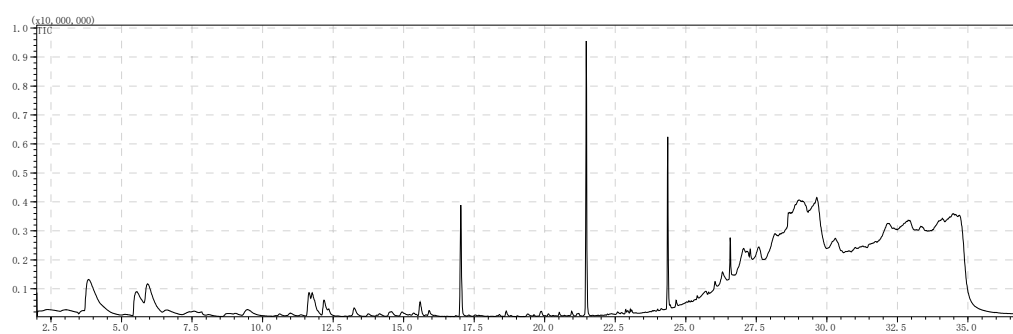

**Figure S3.** VOCs chromatograms of AA breast
